# Supplementary material
Source: PubMed Central journal article supplement (PMC3251172)

SUPPLEMENT Figure 1

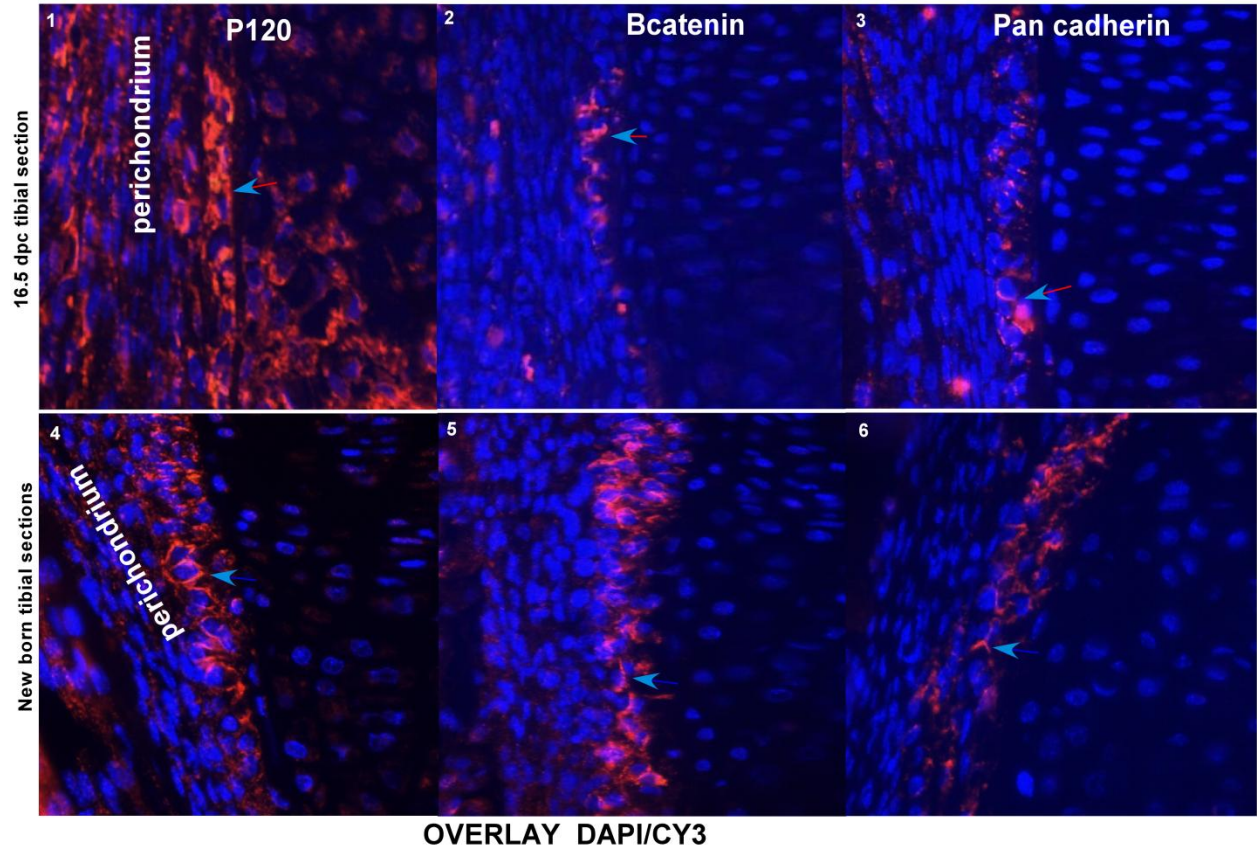

SUPPLEMENT Figure 2

A

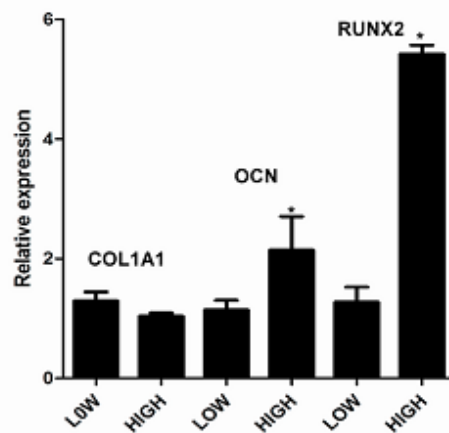

B

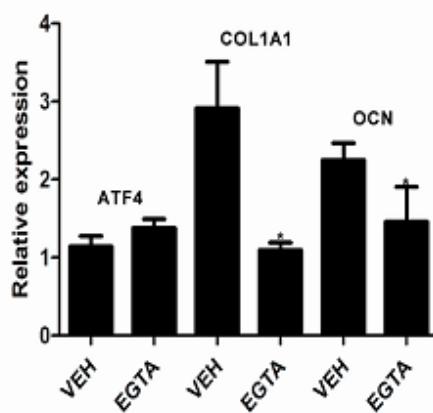

Supplement: NIHMS326715-supplement-01.pdf [file NIHMS326715-supplement-01.pdf]
